# Supplementary material for: 2-(2-Methyl-2-nitrovinyl)furan but Not Furvina Interfere with Staphylococcus aureus Agr Quorum-Sensing System and Potentiate the Action of Fusidic Acid against Biofilms
Source: MDPI journal article supplement (doi:10.3390/ijms22020613), 2021-01-09
Supplement: s1 [file s1]

## Supplemental material

### ALC1742 with RNAlI promoter

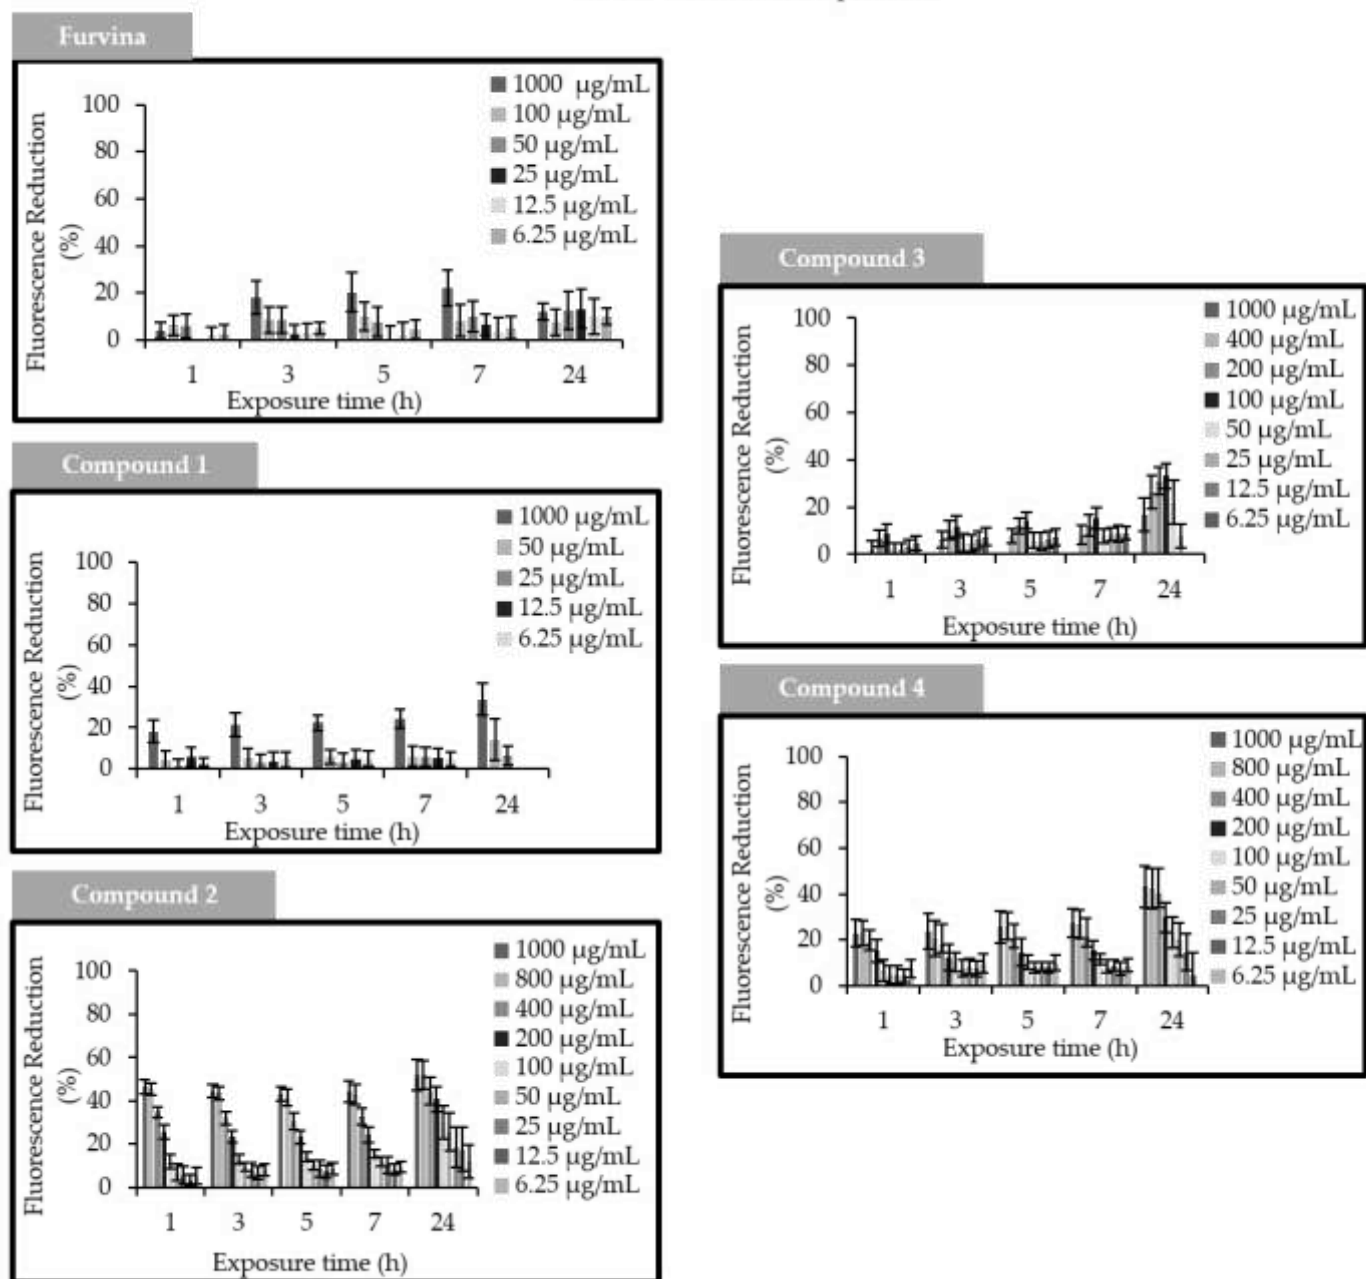

**Figure S1** – Quorum-sensing interference screening using Furvina and all the structurally related compounds at different time-points. The interference was measured as the fluorescence emission reduction of ALC1742 with a RNAlI promoter caused by the compounds. Mean values  $\pm$  standard deviation are illustrated in the figure.

### ALC1743 with RNAlII promotor

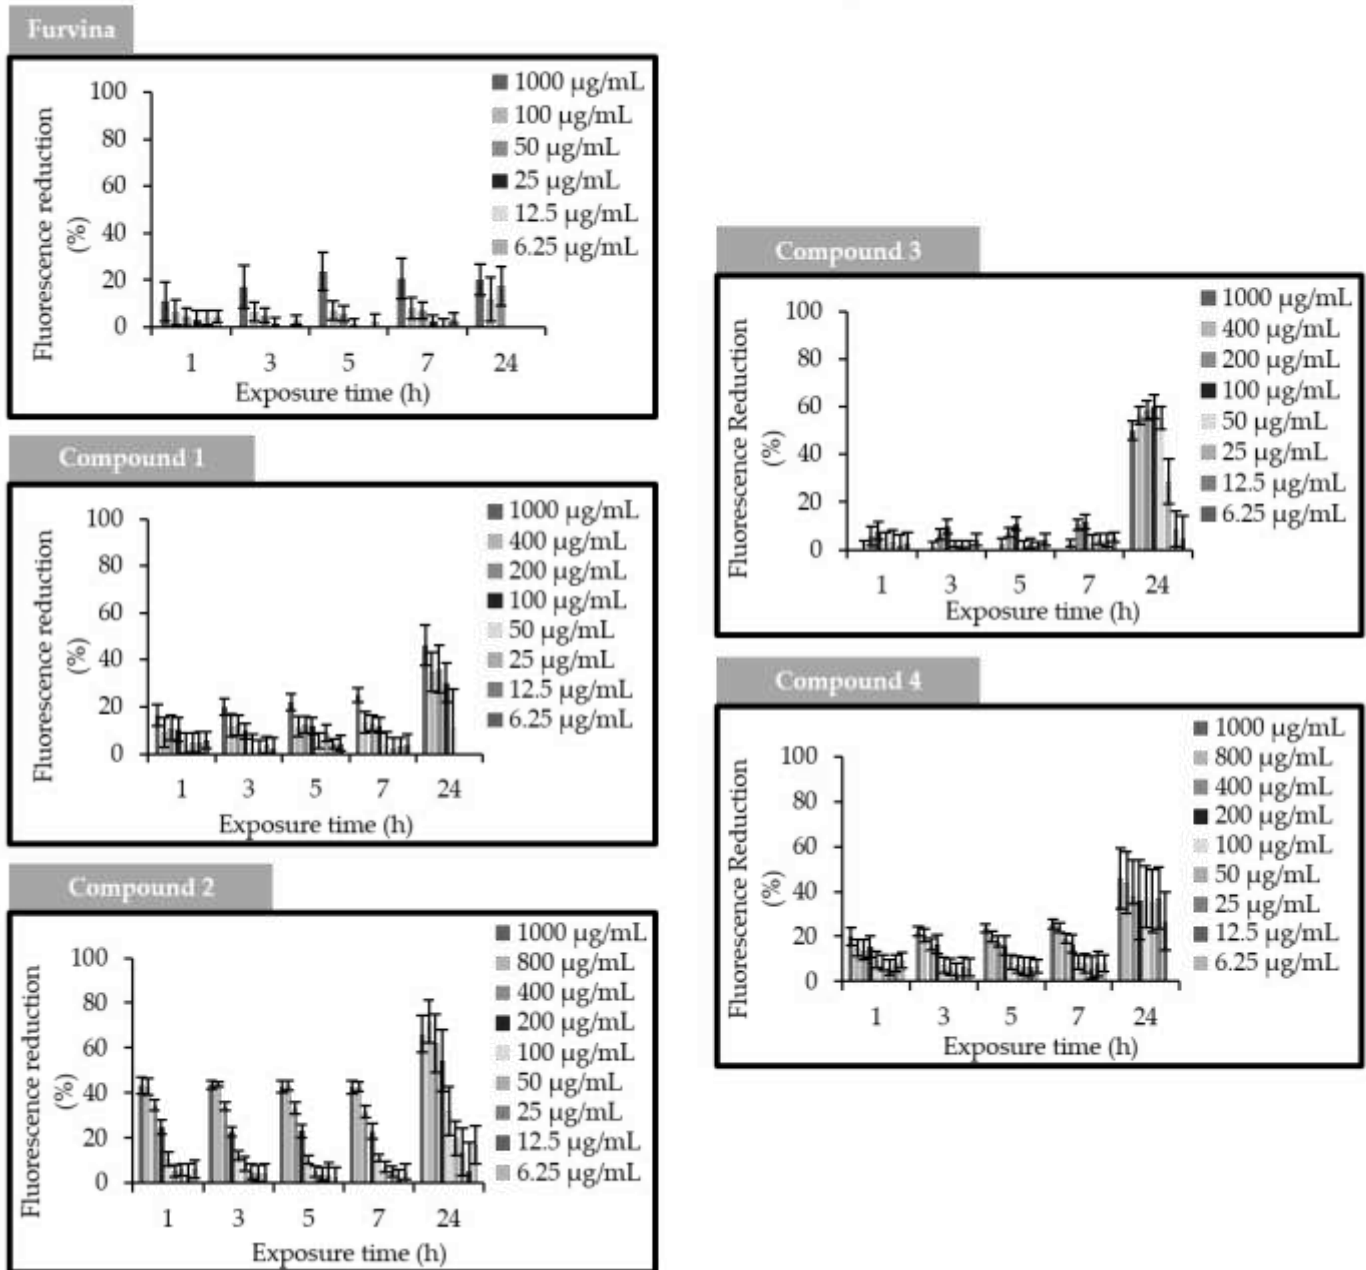

**Figure S2** – Quorum-sensing interference screening using Furvina and all the structurally related compounds at different time-points. The interference was measured as the fluorescence emission reduction of ALC1743 with a RNAlII promotor caused by the compounds. Mean values  $\pm$  standard deviation are illustrated in the Figure.
